# Supplementary material
Source: PubMed Central journal article supplement (PMC3719930)

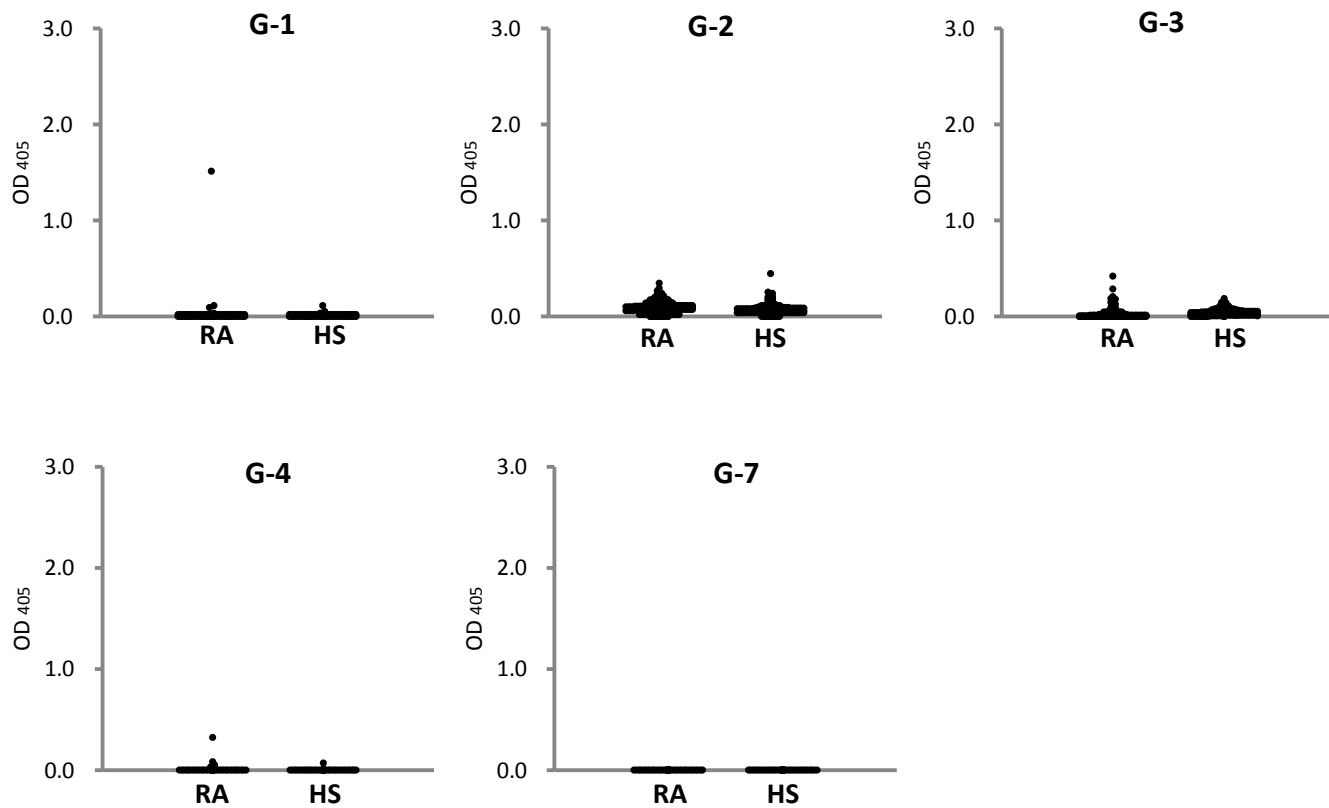

Supplement: cei0172-0044-SD1.pdf [file cei0172-0044-SD1.pdf]
